# Supplementary material for: Novel carbon-fiber microelectrode batch fabrication using a 3D-printed mold and polyimide resin
Source: Royal Society of Chemistry journal article supplement (doi:10.1039/c6an01469k), 2016-01-01
Supplement: c6an01469k1.pdf [file c6an01469k1.pdf]

**Supplemental Information for:**

**Novel Carbon-Fiber Microelectrode Batch Fabrication using a 3D-Printed Mold  
and Polyimide Resin**

Eleferios Trikantopoulos<sup>+</sup>, Cheng Yang<sup>+</sup>, Mallikarjunarao Ganesana, Ying Wang, B. Jill  
Venton<sup>\*</sup>

*Department of Chemistry, University of Virginia, Charlottesville, VA 22904*

*<sup>+</sup>These authors contributed equally to this work.*

*<sup>\*</sup>Corresponding author: email: [jventon@virginia.edu](mailto:jventon@virginia.edu), Phone 434-243-2132*

Supplemental Information includes additional text describing chemicals, and glass-insulated electrode fabrication.

## **Supplemental Methods**

### **Chemicals**

Dopamine was purchased from Sigma (St. Louis, MO). A 10 mM stock solution was prepared in 0.1 M perchloric acid and diluted daily to the desired concentration in phosphate-buffered saline (PBS) (131.5 mM NaCl, 3.25 mM KCl, 1.2 mM CaCl<sub>2</sub>, 1.25 mM NaH<sub>2</sub>PO<sub>4</sub>, 1.2 mM MgCl<sub>2</sub>, and 2.0 mM Na<sub>2</sub>SO<sub>4</sub> with the pH adjusted to 7.4). All aqueous solutions were made with deionized water (Millipore, Billerica, MA).

### **Glass-insulated Electrode fabrication**

Glass insulated cylindrical carbon-fiber microelectrodes were made by aspirating a single carbon fiber into a glass capillary (1.2 mm by 0.68 mm, A-M Systems, Inc., Carlsborg, WA). The capillary was pulled to form two electrodes on a vertical pipette puller (Narishige, model PE-21, Tokyo, Japan), and the fiber cut to length.
